# Supplementary material for: Simple, sensitive and selective detection of dopamine using dithiobis(succinimidylpropionate)-modified gold nanoparticles as colorimetric probes
Source: Royal Society of Chemistry journal article supplement (doi:10.1039/c2an35734h), 2012-01-01
Supplement: c2an35734h.pdf [file c2an35734h.pdf]

## Electronic Supplementary Information

### **Simple, sensitive and selective detection of dopamine using dithiobis(succinimidylpropionate)-modified gold nanoparticles as colorimetric probes**

Lin Liu<sup>\*a</sup>, Sujuan Li<sup>a</sup>, Leilei Liu<sup>a</sup>, Dehua Deng<sup>a</sup>, Ning Xia<sup>\*b</sup>

<sup>a</sup>College of Chemistry and Chemical Engineering, Anyang Normal University, Anyang, Henan 455000, People's Republic of China

<sup>b</sup>College of Chemistry and Chemical Engineering, Central South University, Changsha, Hunan 410083, People's Republic of China

\*Corresponding author. Tel: 86-732-2900040; *E-mail address*: liulin82414@yahoo.com.cn (L. Liu), xianing82414@csu.edu.cn (N. Xia)

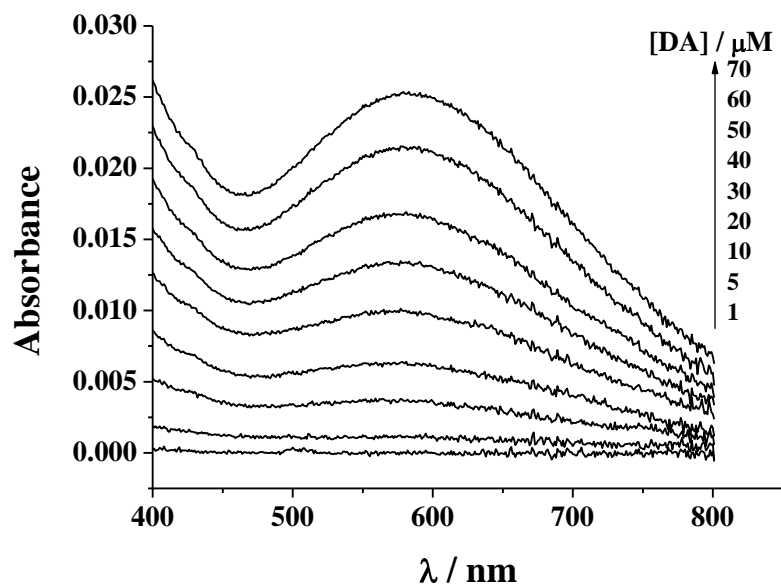

**Fig. S1** UV/Vis spectra of the DA-Fe<sup>3+</sup> complex. The concentration ratio of DA and Fe<sup>3+</sup> kept at 1:1.

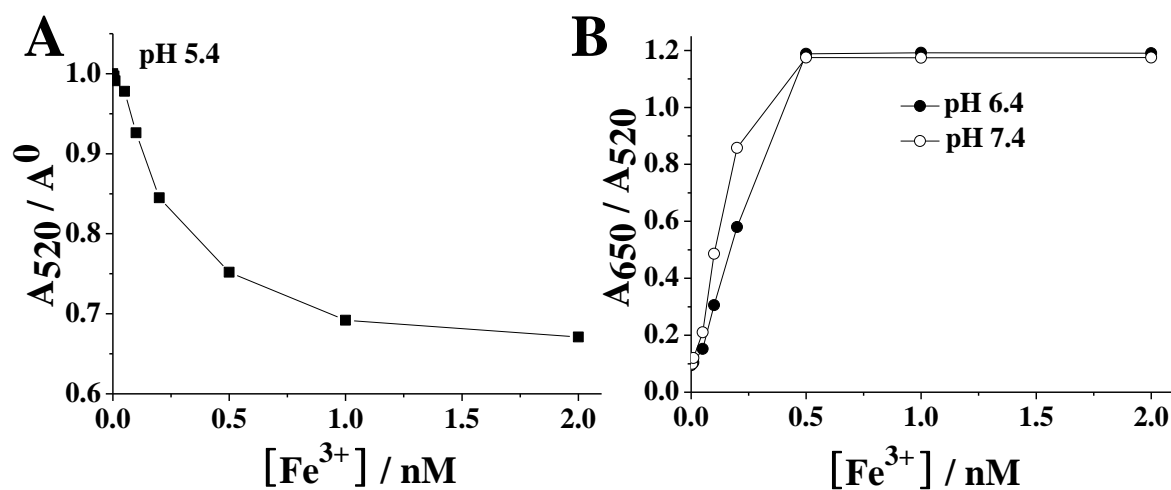

**Fig. S2** Dependence of absorbance change of DA-anchored DSP-AuNPs on the Fe<sup>3+</sup> concentration at different pH. The concentration of DA kept at 1 μM.

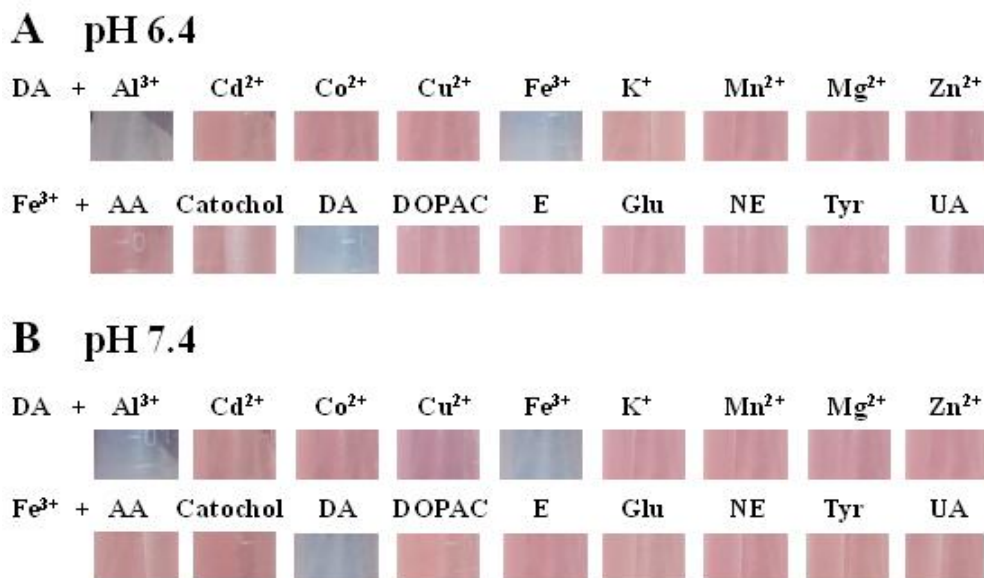

**Fig. S3** Color change of DSP-AuNPs in different systems: DA + metal ions and DA/interferences + Fe<sup>3+</sup>.

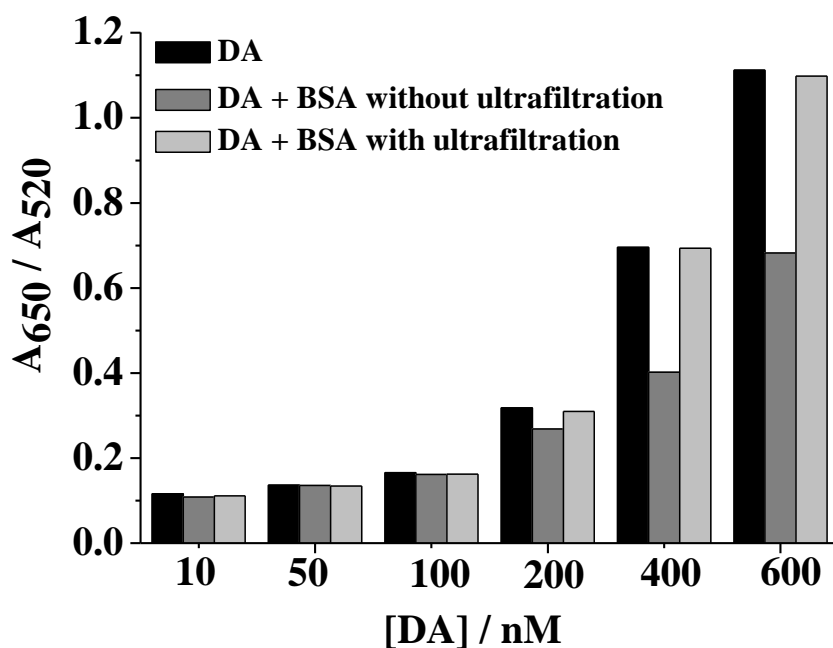

**Fig. S4** Effect of BSA on the  $A_{650}/A_{520}$  ratio at different concentrations of DA. The concentration of BSA kept at 0.5  $\mu$ M.
